# Supplementary material
Source: PubMed Central journal article supplement (PMC7946780)
Supplement: NIHMS1664162-supplement-1.pdf [file NIHMS1664162-supplement-1.pdf]

Supplementary Information for

**ImmunoPET-informed sequence for focused ultrasound-targeted  
mCD47 blockade controls glioma**

Natasha D. Sheybani<sup>1</sup>, Victoria R. Breza<sup>1</sup>, Soumen Paul<sup>2</sup>, Katelyenn S. McCauley<sup>2</sup>,  
Stuart S. Berr<sup>2</sup>, G. Wilson Miller<sup>1,2</sup>, Kiel D. Neumann<sup>2</sup>, Richard J. Price<sup>1,2</sup>

**Corresponding Authors:** Richard J. Price and Natasha D. Sheybani

E-mail: rprice@virginia.edu; nds3sa@virginia.edu

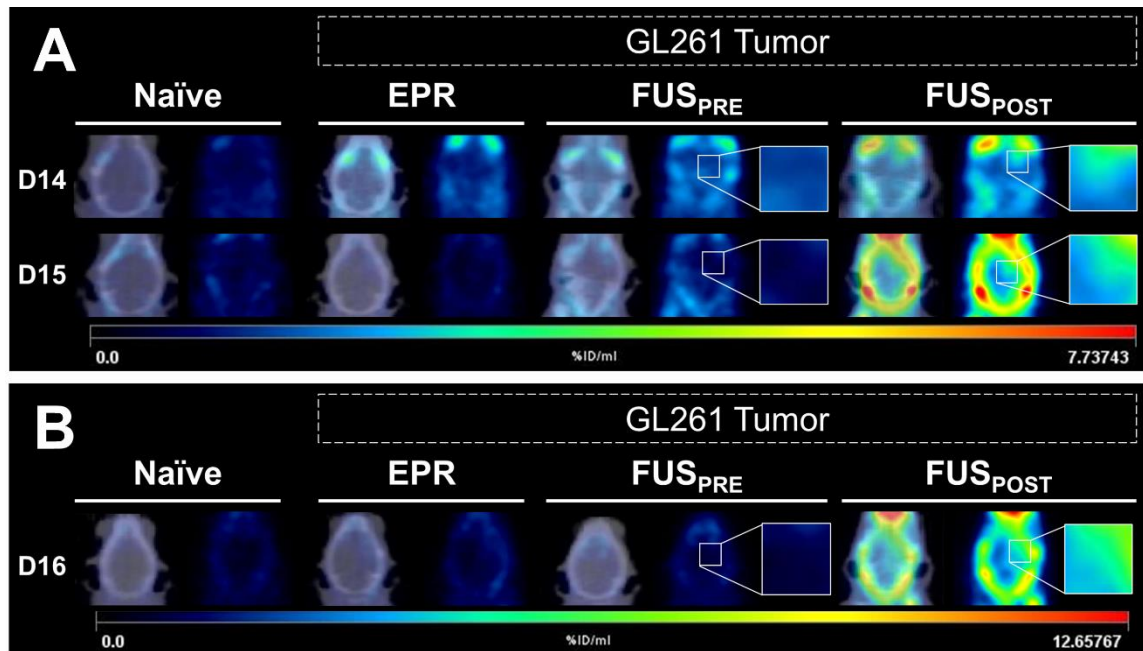

**Figure S1. Representative longitudinal Immuno-PET images.** Axial decay-corrected fused PET/CT (left) and SUV (right) images for representative mice in each experimental group on D14-15 (A) and D16 (B). Zoomed insets (white box) in the targeted hemisphere depict qualitative differences in [<sup>89</sup>Zr]-mCD47 uptake across FUS groups. Scale unit: % Injected Dose (ID) per mL. Note that images could not be shown on the same scale across all timepoints due to signal saturation in select groups.

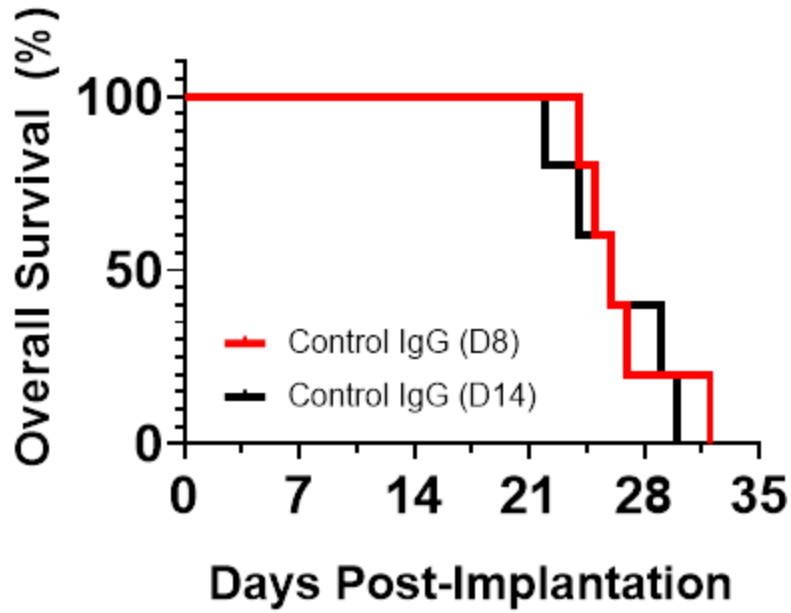

**Figure S2. Overall survival of control GL261-bearing mice.** Kaplan-Meier curve depicting overall survival of control GL261-bearing mice receiving systemic control IgG antibody. Treatments were initiated either 8 (D8) or 14 (D14) days post-implantation.  $n=5$  mice per group. Significance assessed by log-rank (Mantel-Cox) test. No significant difference detected.

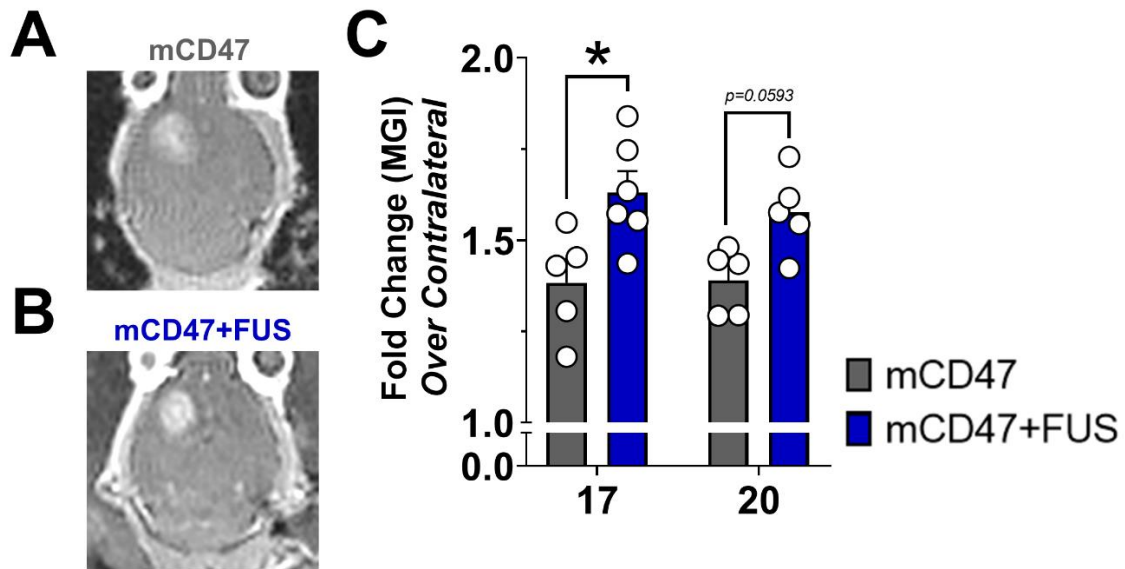

**Figure S3. BBB/BTB permeability in baseline pre-treatment planning MRIs from mCD47 survival study.** (A, B) Representative baseline contrast-enhanced MR images of GL261 tumor-bearing brains at Day 17. (C) Mean greyscale intensity (MGI) of contrast enhancement for GL261 tumors in mCD47 and mCD47+FUS groups, calculated as fold change over contralateral brain. \* $p=0.0093$ . Significance assessed by RM mixed effects model implementing restricted maximum likelihood method, followed by Sidak's multiple comparison correction.
